# Supplementary material for: Targeting HDAC6 to treat heart failure with preserved ejection fraction in mice
Source: PubMed Central journal article supplement (PMC10897156; doi:10.1038/s41467-024-45440-7), 2024-02-26
Supplement: 41467_2024_45440_MOESM1_ESM.pdf [file 41467_2024_45440_MOESM1_ESM.pdf]

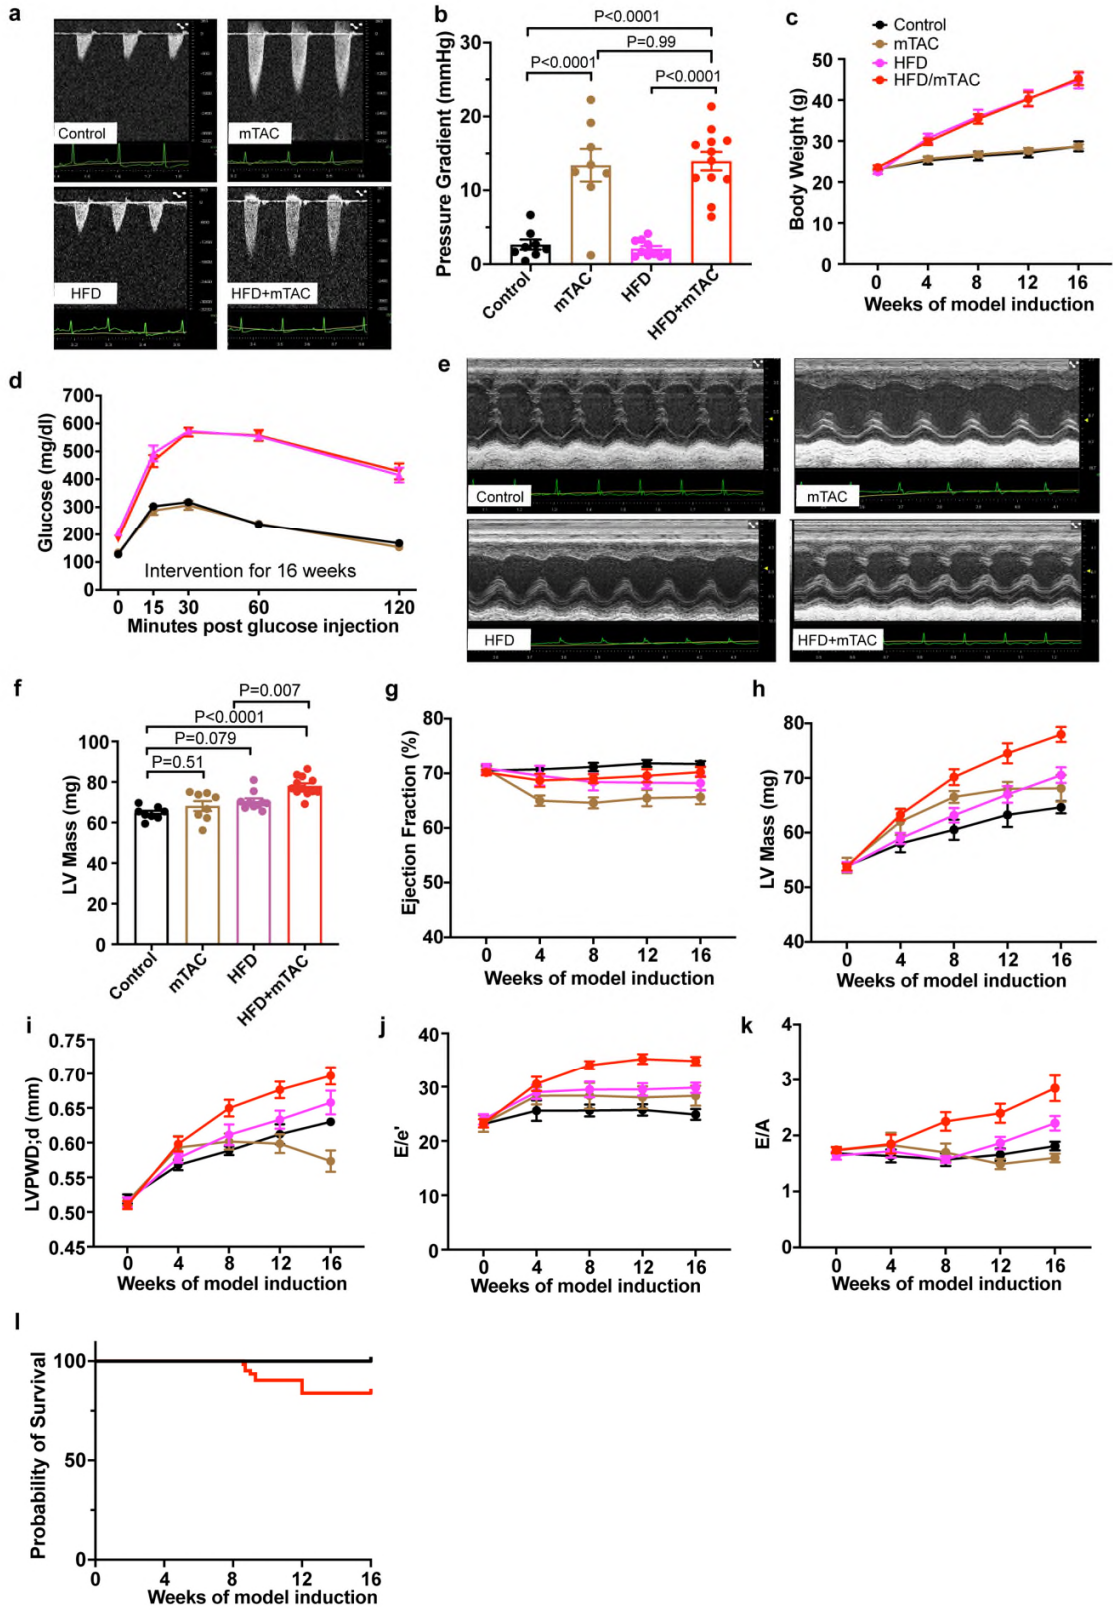

**Supplementary Fig. 1. Characterization of the HFD+mTAC model.**

**a**, Representative pulsed-wave Doppler images of the aortic arch. **b**, Quantitation of pressure gradient in the experimental groups (control  $n=8$ , mTAC  $n=8$ , HFD  $n=10$ , HFD+mTAC  $n=12$  mice). **c**, Body weight of mice in each group recorded every 4 weeks (control  $n=8$ , mTAC  $n=8$ , HFD  $n=10$ , HFD+mTAC  $n=12$  mice). **d**, Intraperitoneal glucose-tolerance test 16 weeks after induction (control  $n=12$ , mTAC  $n=8$ , HFD  $n=10$ , HFD+mTAC  $n=10$  mice). **e**, Representative Echocardiography M-Mode images. **f**, Echocardiographic measurement of LV mass 16 weeks after induction (control  $n=8$ , mTAC  $n=8$ , HFD  $n=10$ , HFD+mTAC  $n=12$  mice). **g-k**, Longitudinal follow up of (**g**) EF, (**h**) LV mass, (**i**) LVPWd, (**j**)  $E/e'$ , and (**k**) E/A with echocardiography every 4 weeks until 16 weeks after induction (control  $n=8$ , mTAC  $n=8$ , HFD  $n=10$ , HFD+mTAC  $n=12$  mice). **l**, Kaplan Meier curve of control and HFD+mTAC mice. (control  $n=12$ , mTAC  $n=8$ , HFD  $n=8$ , HFD+mTAC  $n=62$  mice). Data are expressed as the mean  $\pm$  SEM. Statistical analysis was performed using one-way ANOVA followed by Tukey's multiple comparisons test (**b**, **f**). The exact  $P$  values are shown in the figures. NS, not significant. Source data are provided as a Source Data file.

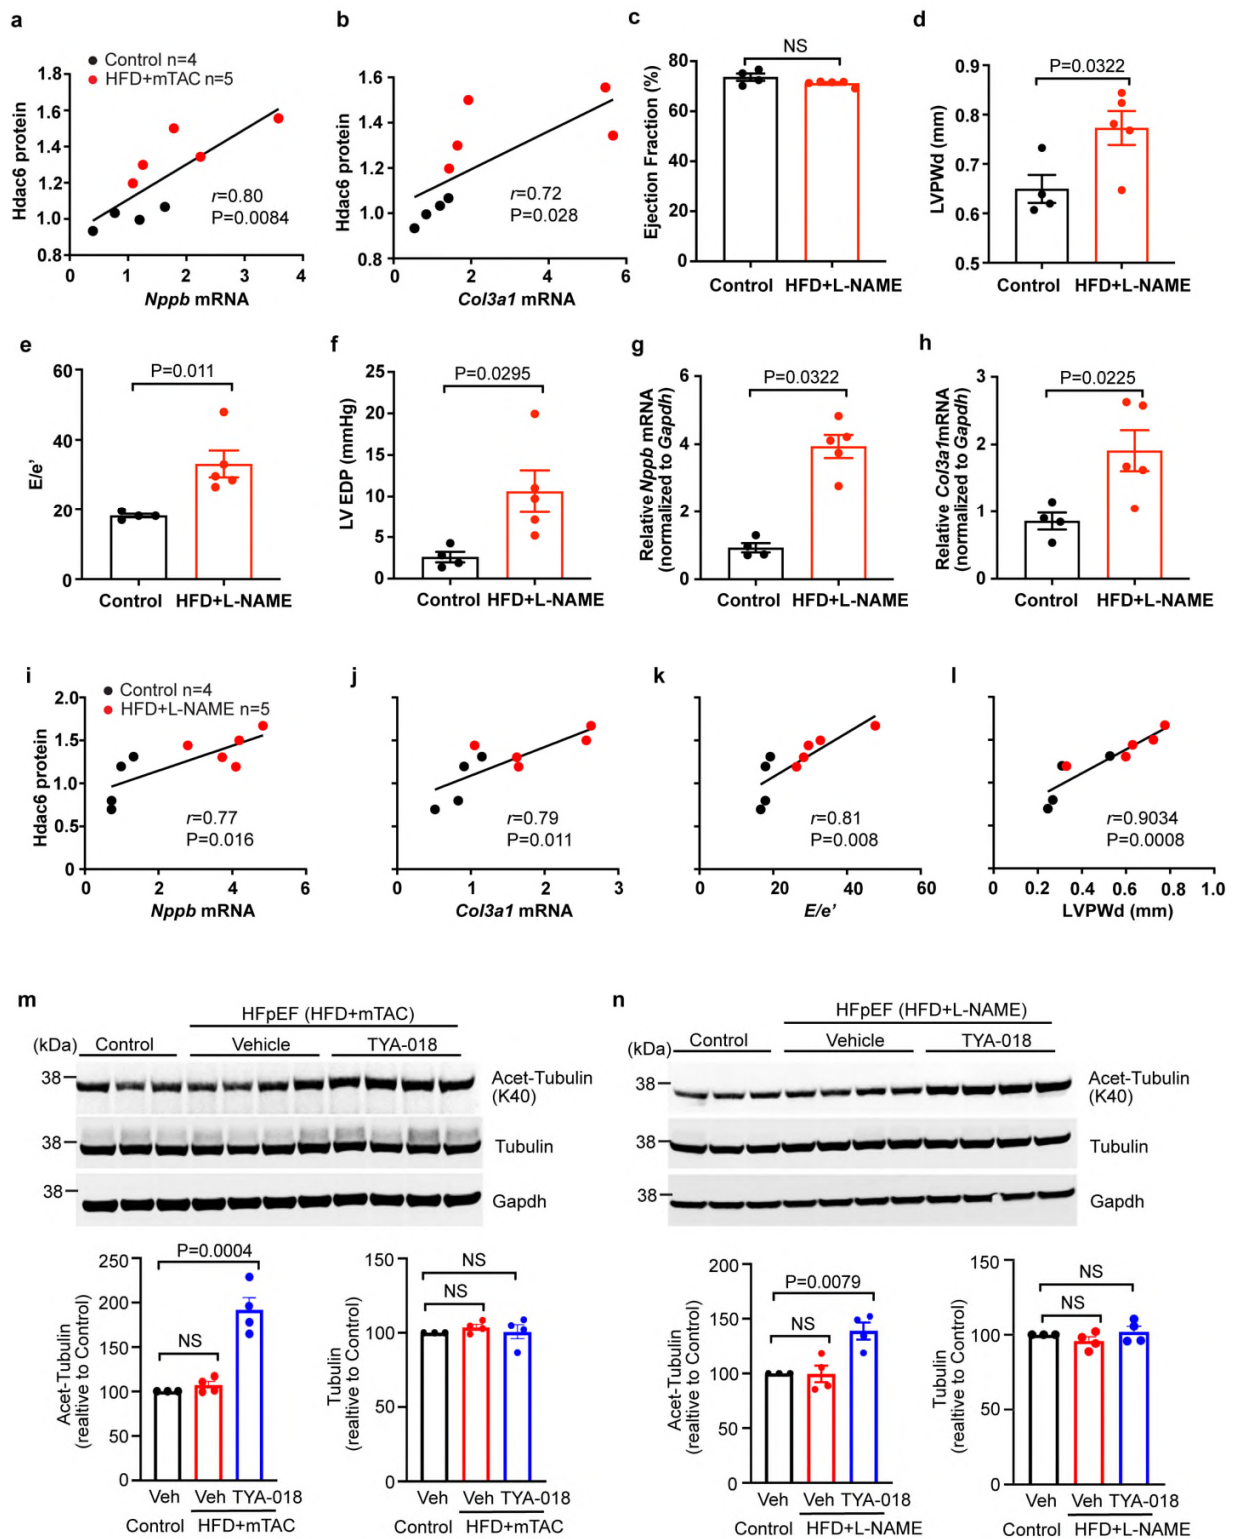

**Supplementary Fig. 2. HDAC6 is upregulated in HFpEF hearts and correlates with heart failure marker genes and echocardiography parameters.**

Correlation of Hdac6 protein with (a) *Nppb* and (b) *Col3a1* mRNA expression in hearts of control ( $n=4$ ) and HFD+mTAC ( $n=5$ ) mice. c-e, Echocardiographic measurement of (c) EF, (d) LVPWd, and (e) E/e' in HFD+L-NAME mice. (f) EDP measured using an in vivo catheter in control ( $n=4$ ) and HFD+L-NAME ( $n=5$ ) mice. Quantitation of (g) *Nppb* and (h) *Col3a1* mRNA expression in control ( $n=4$ ) and HFD+L-NAME ( $n=5$ ) mice. Correlation of Hdac6 protein with (i) *Nppb* and (j) *Col3a1* mRNA expression in heart tissues of control ( $n=4$ ) and HFD+L-NAME ( $n=5$ ) mice. Correlation of HDAC6 protein with (k) E/e' and (l) LVPWd in control ( $n=4$ ) and HFD+L-NAME ( $n=5$ ) mice. Western blot analysis of Acetyl-tubulin, Tubulin, Gapdh in mouse hearts of control ( $n=3$ ), HFD+mTAC (m) and HFD+L-NAME (n) model treated with vehicle ( $n=4$ ) or TYA-018 15mg/kg ( $n=4$ ). Data are expressed as the mean  $\pm$  SEM. The two-tailed  $P$  value for Pearson correlation coefficient ( $r$ ) (a, b, i-l). Statistical significance was assessed by unpaired two-sided Student's  $t$  test (c-h) or one-way ANOVA followed by Tukey's multiple comparisons test (m, n). The exact  $P$  and  $r$  values are shown in the figures. NS, not significant. Source data are provided as a Source Data file.

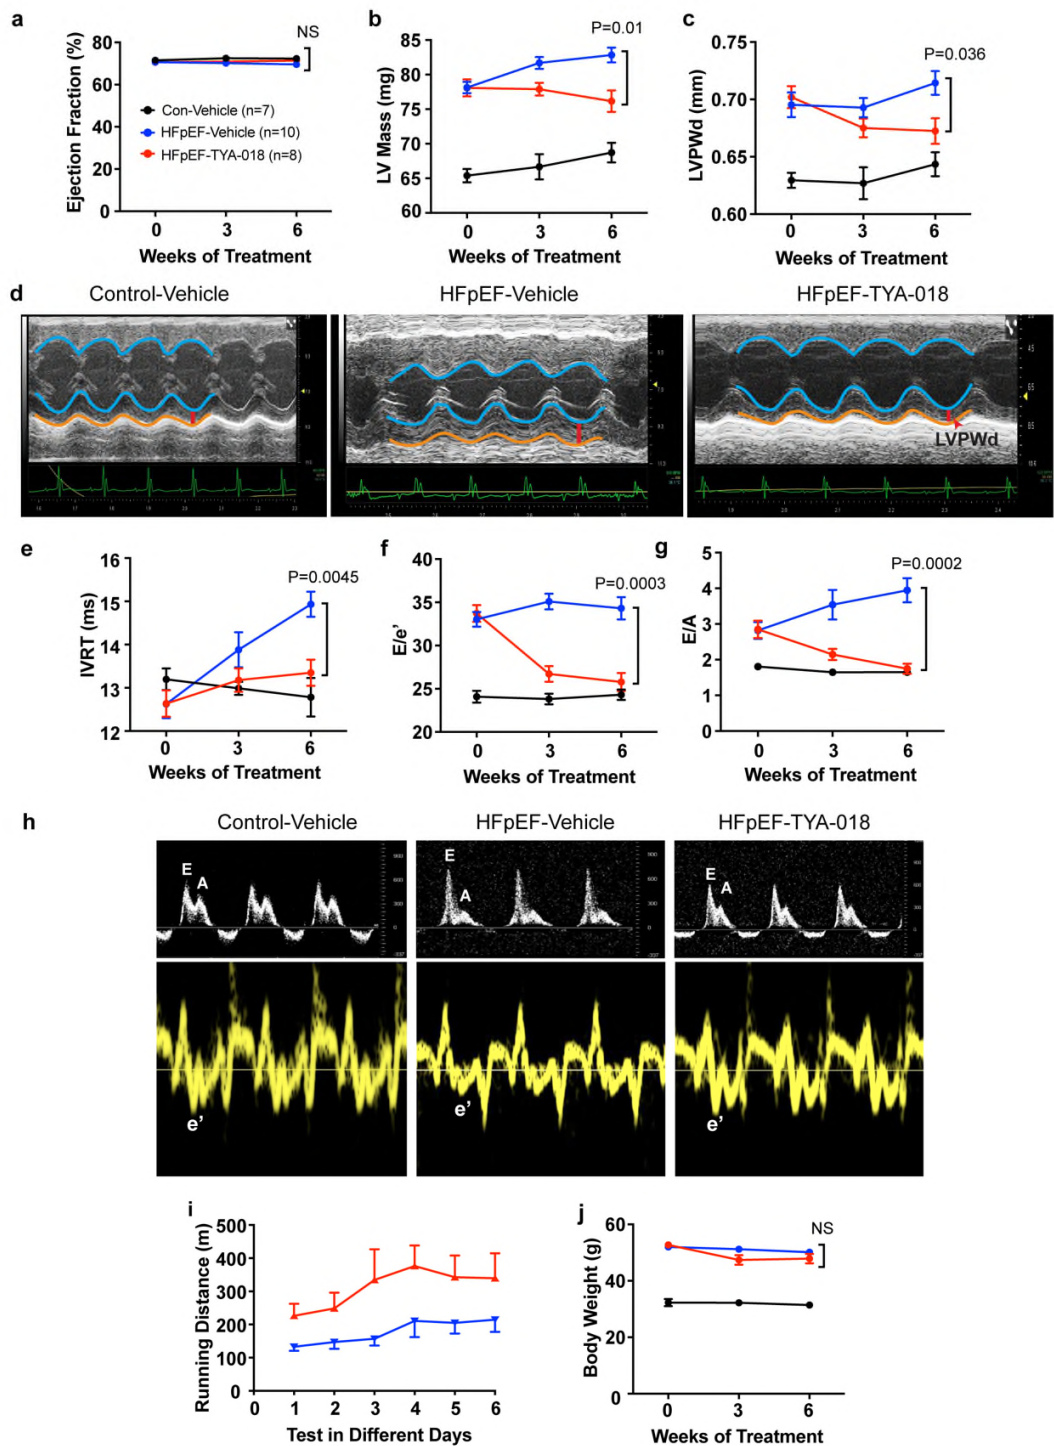

**Supplementary Fig. 3. Time course of improvements in heart function in HFpEF model after TYA-018 treatment.**

**a-g**, Longitudinal follow up of EF, LV mass, LVPWd, IVRT, E/e', and E/A using echocardiography 3 weeks and 6 weeks after treatment (Control  $n=7$ , HFD+mTAC-

Vehicle  $n=10$ , HFD+mTAC-TYA-018  $n=8$  mice). Representative LV M-mode echocardiographic tracings after 6 weeks of treatment (**d**). Images are representative of 7–10 mice. **h**, Representative pulsed-wave Doppler (top) and tissue Doppler (bottom) tracings after 6 weeks of treatment. Images are representative of 7–10 mice. **i**, Running distance recording of exercise exhaustion test over six days. **j**, Body weight of mice recorded every 3 weeks. Data are expressed as the mean  $\pm$  SEM. Statistical analysis was performed using two-way ANOVA followed by Tukey's multiple comparisons test (**a-c**, **e-g**, **o**). The exact  $P$  values of comparison between group HFpEF-Veh vs. HFpEF-TYA-018 are shown in the figures. NS, not significant. Source data are provided as a Source Data file.

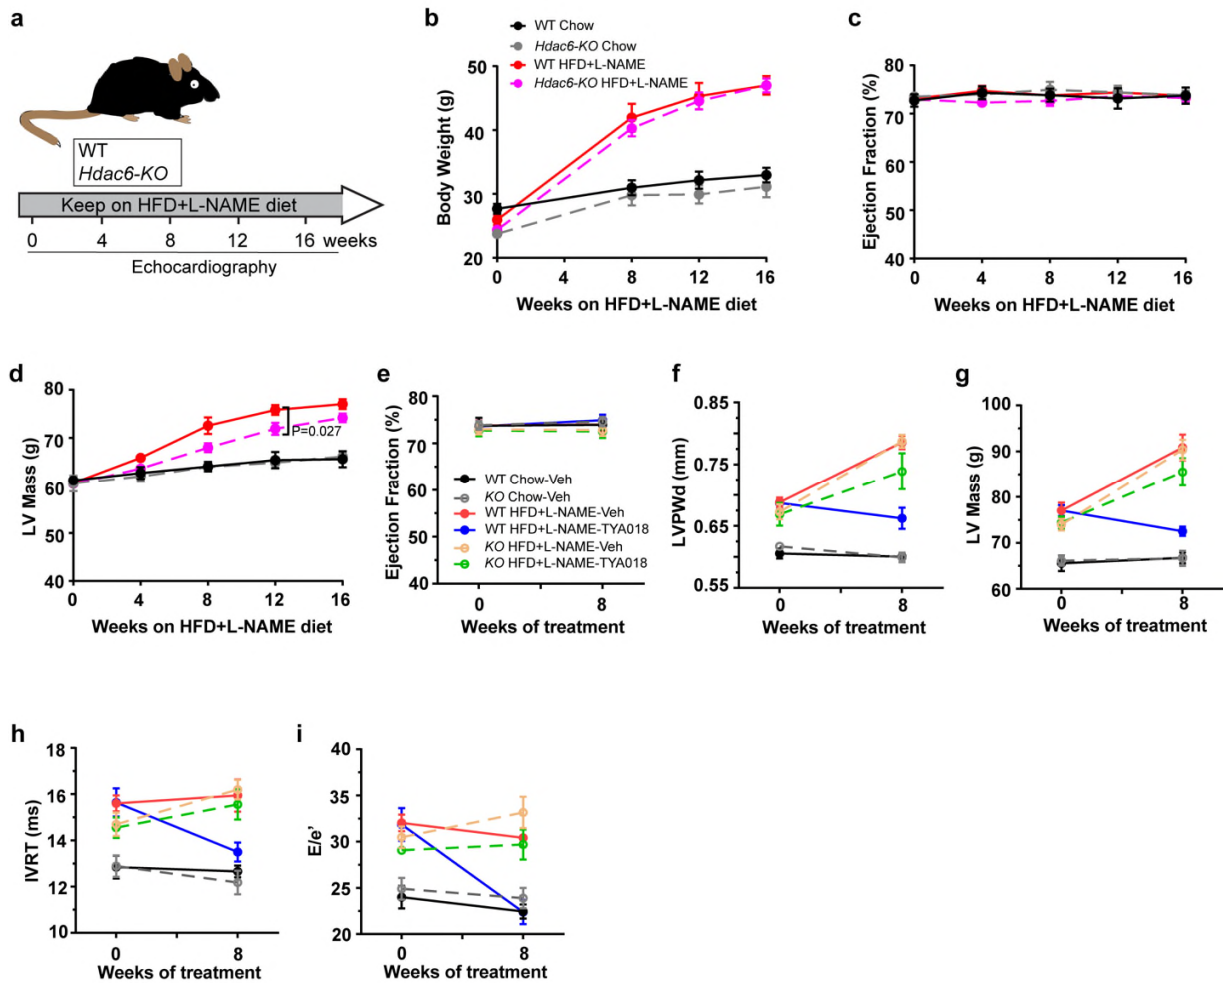

### Supplementary Fig. 4. *Hdac6*-KO mice develop less severe HFpEF phenotypes, and not response to TYA-018 treatment.

**a**, Schematic overview of study design. *Hdac6* knockout (KO) and wild-type littermates treated with HFD+L-NAME for 16 weeks. Echocardiography was performed every 4 weeks after treatment. **b-f**, Time course of (b) body weight and echocardiography measurements of (c) EF, (d) LV mass by 16 weeks of HFD+L-NAME treatment. **E-I**, Time course of echocardiography measurements of (e) EF, (f) LVPWd, (g) LV mass, (h) IVRT and (i) E/e' by 8 weeks of TYA-018 treatment. Data are expressed as the mean  $\pm$  SEM. Statistical analysis was performed using two-way ANOVA followed by Tukey's multiple comparisons test (d). The exact *P* values of comparison between group WT-HFD+L-NAME vs. KO-HFD+L-NAME are shown in the figures. NS, not significant. Source data are provided as a Source Data file.

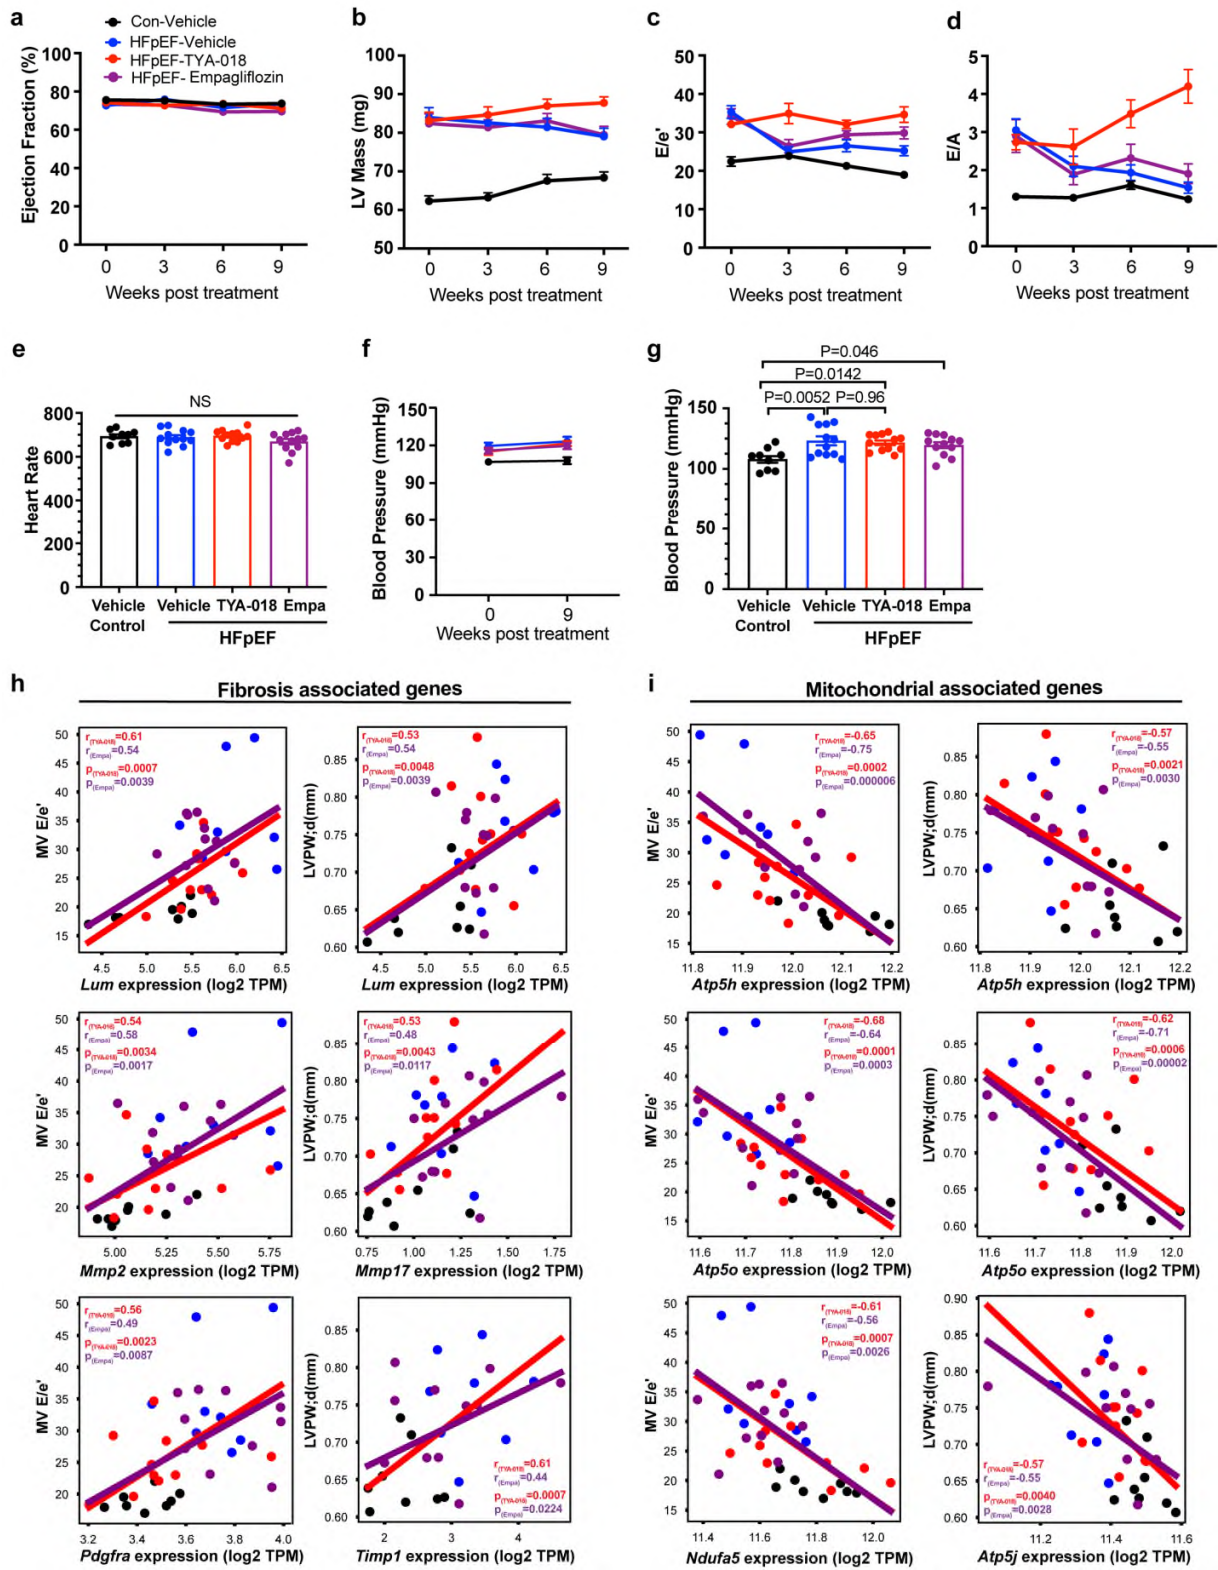



**Supplementary Fig. 5. TYA-018 demonstrated comparable efficacy to empagliflozin in HFD+L-NAME mice.**

**a-d**, Longitudinal heart function measurements of (a) EF, (b) LV mass, (c) E/e' and (d) E/A with echocardiography after 3, 6, and 9 weeks of treatment with vehicle, TYA-018, or empagliflozin. **e**, heart rate after 9 weeks of treatment, **f**, time course of blood pressure at pre-dose and 9 weeks of treatment, **g**, blood pressure at 9 weeks of treatment. **h**, Correlation of E/e' and LVPWd with mRNA expression of the fibrosis-associated genes *Lum*, *Mmp2*, and *Pdgfra* in HFpEF mice treated with TYA-018 or empagliflozin. **i**, Correlation of E/e' and LVPWd with mRNA expression of the mitochondrial function-associated genes *Atp5h*, *Atp5o*, and *Ndufa5* in HFpEF mice treated with TYA-018 or empagliflozin. Data are expressed as the mean  $\pm$  SEM. Statistical significance was assessed by unpaired one-way ANOVA followed by Tukey's multiple comparisons test (**e**, **g**). The two-tailed *P* value for Pearson correlation coefficient (*r*) (**h**, **i**). The exact *P* and *r* values are shown in the figures. Source data are provided as a Source Data file.

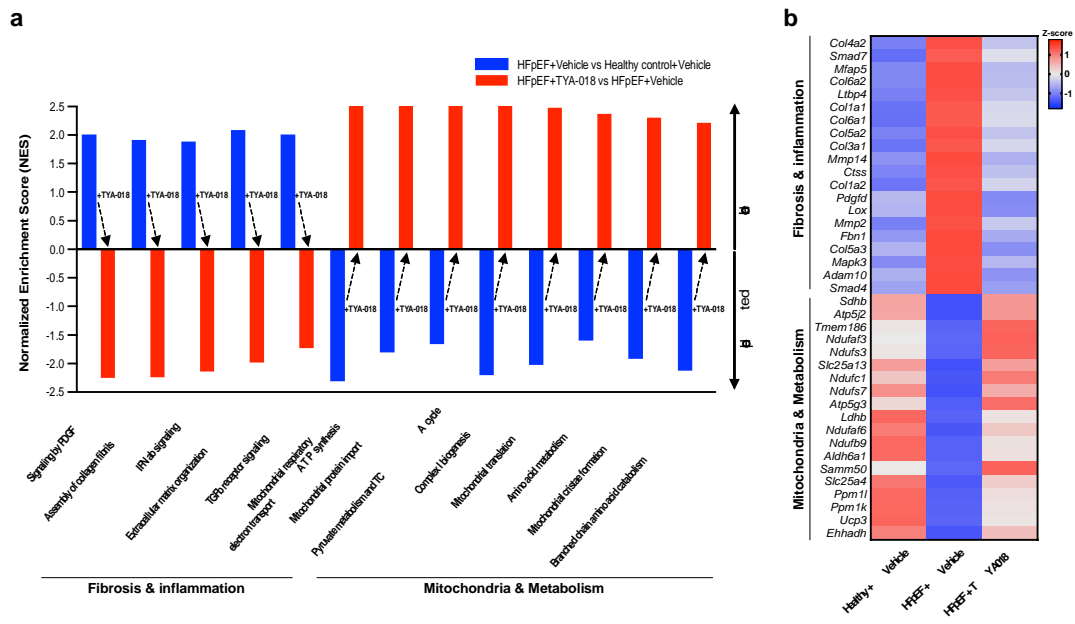

**Supplementary Fig. 6. Single dose of TYA-018 corrects expression of gene sets associated with fibrosis and mitochondrial function.**

**a**, GSEA of heart samples collected after one dose of vehicle or 15 mg/kg TYA-018 in HFD+L-NAME mice ( $n = 4$  animals per group). Shown pathways were selected from MSigDB canonical pathways. **b**, Heatmap shows the expressional pattern of selected genes from gene set enrichment terms.

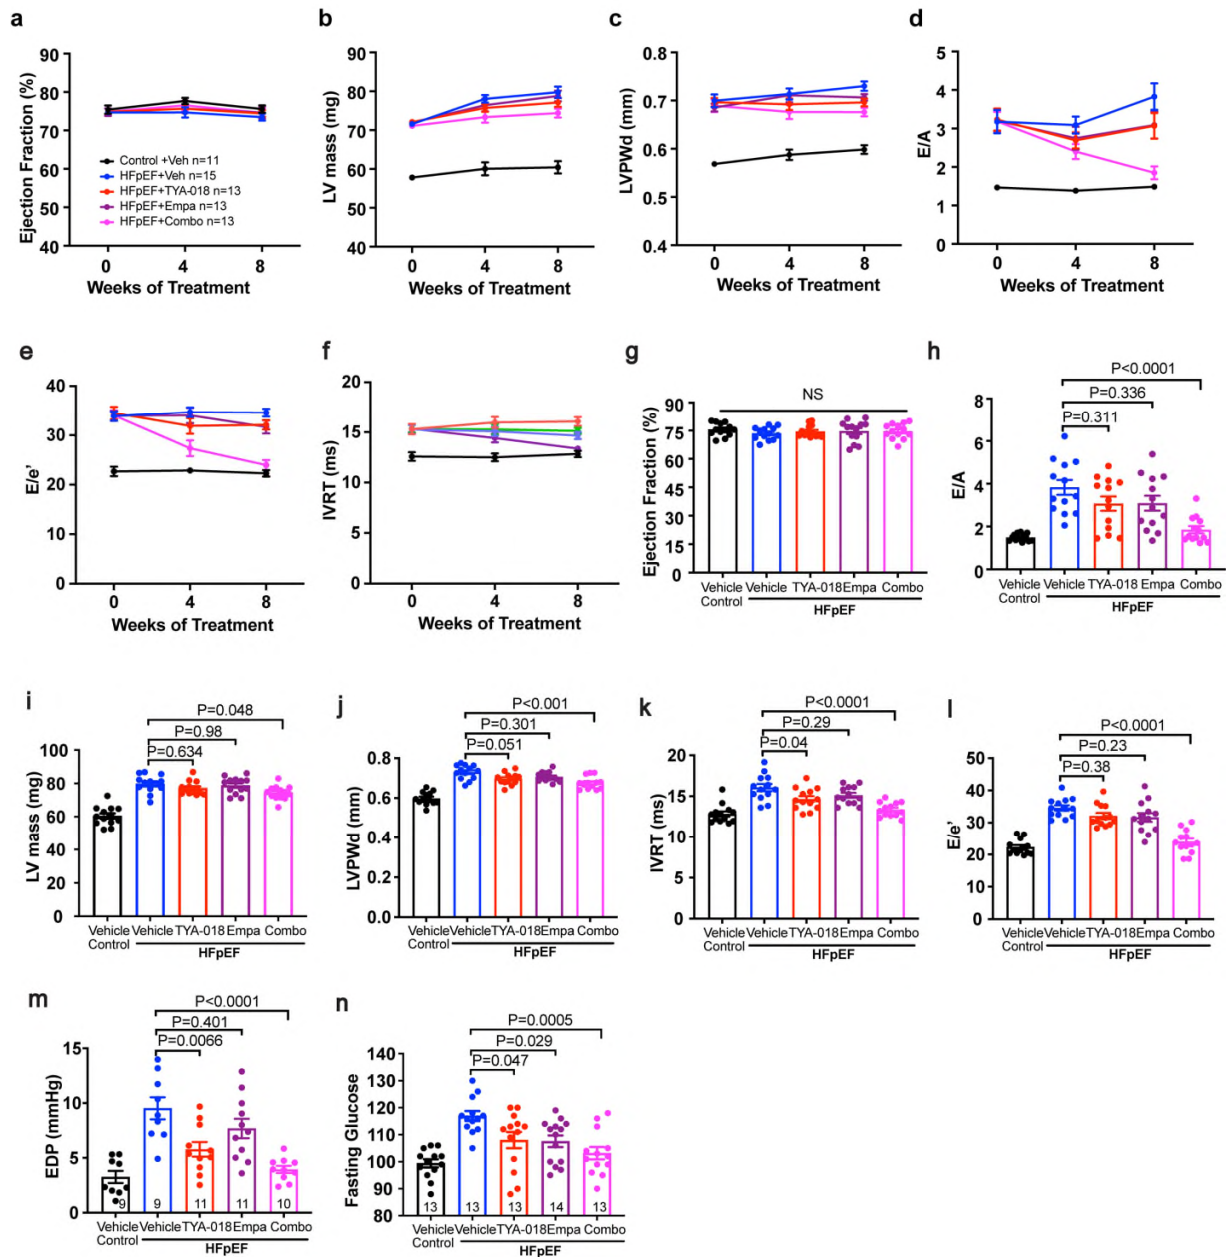

### Supplementary Fig. 7. Combination Effects of TYA-018 and Empagliflozin in HFpEF

Longitudinal heart function measurements of (a) EF, (b) LV mass, (c) LVPWd, (d) E/A, (e) E/e' and (f) IVRT with echocardiography after 4, and 8 weeks of treatment with vehicle, 0.3mg/kg TYA-018, 0.5mg/kg empagliflozin or combination of TYA-018 and empagliflozin. Echocardiography quantitation of the (g) EF, (h) E/A, (i) LV Mass (j) LVPWd, (k) IVRT, (l) E/e', and (m) EDP after 8 weeks of treatment in combination therapy study in HFD+L-NAME HFpEF model. Mice number in each group is indicated

in panel **a**. (**n**) Quantitation of blood glucose at 6 hours after dosing with 0.3mg/kg TYA-018, 0.5mg/kg empagliflozin or combination of the two compounds and fasting. Mice number in each group is indicated in graphs (**m**, **n**). Data are expressed as the mean  $\pm$  SEM. Statistical significance was assessed by one-way ANOVA followed by Tukey's multiple comparisons test (**h-n**). The exact *P* are shown in the figures. NS, not significant. Source data are provided as a Source Data file.

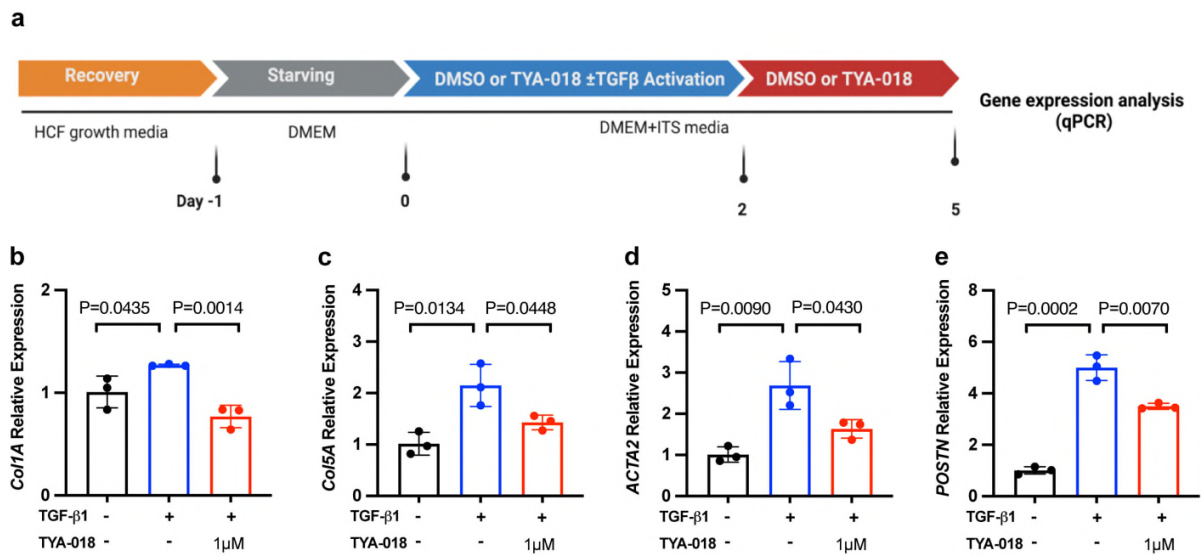

**Supplementary Fig. 8. TYA-018 reduces activation of cardiac fibroblasts.**

**a**, Schematic diagram of gene expression analysis of cardiac fibroblast activation assay in vitro using TGF- $\beta$ . **b-e**, qPCR analysis of *Col1a*, *Col5a*, *Acta2*, and *Postn* in cardiac fibroblasts treated with vehicle (n=3) or TYA-018 (1  $\mu$ M) (n=3). Data are expressed as the mean  $\pm$  SEM. Statistical significance was assessed by one-way ANOVA followed by Tukey's multiple comparisons test (**b-e**). The exact *P* values are shown in the figures. Source data are provided as a Source Data file.

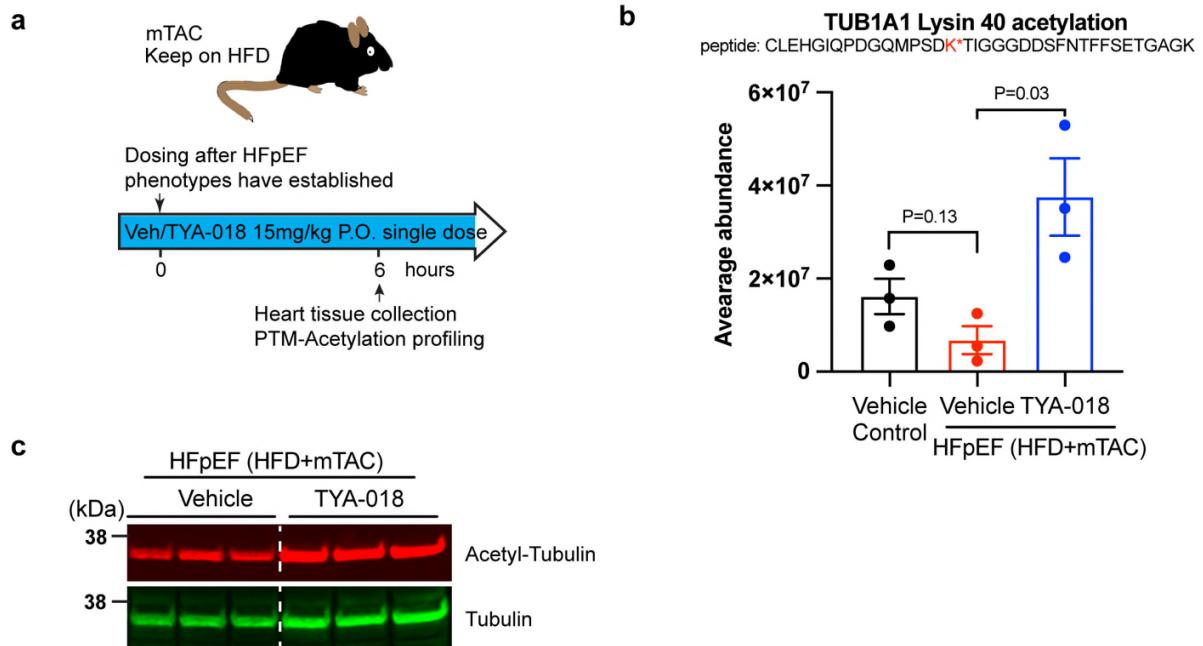

**Supplementary Fig. 9. Potential substrates of HDAC6.**

**a**, Schematic overview of heart sample preparation for PTM-acetylation profiling. **b**, Quantitation of TUB1A1 acetylation of heart tissues treated with vehicle (n=3) or 15 mg/kg TYA-018 (n=3). Data are expressed as the mean  $\pm$  SEM. Statistical significance was assessed by one-way ANOVA followed by Tukey's multiple comparisons test. **c**, Western blot analysis of tubulin and acetyl-tubulin in heart samples from mice treated with vehicle or 15 mg/kg TYA-018. Source data are provided as a Source Data file.

**Supplementary Table 1. TaqMan probes used for qPCR analysis**

| <b>Symbol</b> | <b>Gene name</b>                         | <b>TaqMan assay ID</b> |
|---------------|------------------------------------------|------------------------|
| <i>COL1A1</i> | collagen type I alpha 1                  | Hs00164004_m1          |
| <i>COL5A</i>  | collagen type V alpha 1                  | Hs00609133_m1          |
| <i>POSTN</i>  | periostin                                | Hs01566734_m1          |
| <i>ACTA2</i>  | actin alpha 2, smooth muscle             | Hs00426835_g1          |
| <i>GAPDH</i>  | glyceraldehyde 3-phosphate dehydrogenase | Hs02786624_g1          |
| <i>Nppb</i>   | Natriuretic peptide type B               | Mm01255770_g1          |
| <i>Col3a1</i> | collagen type III alpha 1                | Mm00802300_m1          |
| <i>Gapdh</i>  | glyceraldehyde 3-phosphate dehydrogenase | Mm99999915_g1          |
